# Supplementary material for: Rabies in the African Civet: An Incidental Host for Lyssaviruses?
Source: MDPI journal article supplement (doi:10.3390/v12040368), 2020-03-27
Supplement: s1 [file s1]

**Table S2** RABV sequences used for phylogenetic analysis with African civet sequences (Figure 2). All are complete N gene sequences unless indicated otherwise. Sequences used in Figure 3 Bayesian host trait analysis are underlined.

| GenBank ID      | Original ID | Country  | Host                        | Year Isolated | RABV Variant         |
|-----------------|-------------|----------|-----------------------------|---------------|----------------------|
| <u>AB284514</u> | ZAMRAV23/04 | Zambia   | Dog                         | 2004          | Africa 1<br>Canid    |
| <u>AF467949</u> | 710/90      | RSA      | <i>Cynictis penicillata</i> | 1990          | Africa 3<br>Mongoose |
| <u>DQ837461</u> | S1-81       | Egypt    | Dog                         | 1999          | Africa 4             |
| <u>DQ837462</u> | S2-81       | Egypt    | Dog                         | 1999          | Africa 4             |
| <u>DQ837463</u> | S3-81       | Egypt    | Dog                         | 1999          | Africa 4             |
| EU718759        | Chad_71_164 | Chad     | Dog                         | 2005          | Africa 2             |
| <u>EU853569</u> | 9016MAR     | Morocco  | Dog                         | 1990          | Africa 2             |
| EU835375        |             | Tunisia  | Human                       | 1986          | Africa 2             |
| <u>EU853581</u> | 8808ETH     | Ethiopia | Dog                         | 1988          | Africa 1<br>Canid    |
| <u>EU853586</u> | 07128RCA    | CAR      | Dog                         | 2003          | Africa 2             |
| <u>FJ392366</u> | 19-92       | RSA      | Mongoose                    | 1992          | Africa 3<br>Mongoose |
| <u>FJ392367</u> | 22107       | Zim      | Slender Mongoose            | 2001          | Africa 3<br>Mongoose |
| FJ392368        | 23-01       | RSA      | Meerkat                     | 2001          | Africa 3<br>Mongoose |
| <u>FJ392369</u> | 28-00       | RSA      | Slender Mongoose            | 2000          | Africa 3<br>Mongoose |
| FJ392370        | 30-00       | RSA      | Bovine                      | 2000          | Africa 3             |

|                 |        |     |                           |      |                      |
|-----------------|--------|-----|---------------------------|------|----------------------|
|                 |        |     |                           |      | Mongoose             |
| <u>FJ392371</u> | 32-02  | RSA | Yellow Mongoose           | 2002 | Africa 3<br>Mongoose |
| <u>FJ392372</u> | 113-91 | RSA | <i>Atilux paludinosus</i> | 1991 | Africa 3<br>Mongoose |
| <u>FJ392373</u> | 155-03 | RSA | Slender Mongoose          | 2003 | Africa 3<br>Mongoose |
| <u>FJ392374</u> | 211-98 | RSA | Canine                    | 1998 | Africa 3<br>Mongoose |
| <u>FJ392375</u> | 221-98 | RSA | <i>Suricata suricatta</i> | 1998 | Africa 3<br>Mongoose |
| FJ392376        | 228-01 | RSA | Sheep                     | 2001 | Africa 3<br>Mongoose |
| <u>FJ392377</u> | 279-99 | RSA | Yellow Mongoose           | 1999 | Africa 3<br>Mongoose |
| <u>FJ392378</u> | 344-99 | RSA | Yellow Mongoose           | 1999 | Africa 3<br>Mongoose |
| <u>FJ392379</u> | 364-96 | RSA | Mongoose                  | 1996 | Africa 3<br>Mongoose |
| <u>FJ392380</u> | 381-06 | RSA | Yellow Mongoose           | 2006 | Africa 3<br>Mongoose |
| <u>FJ392381</u> | 385-06 | RSA | Dog                       | 2006 | Africa 3<br>Mongoose |
| FJ392382        | 389-02 | RSA | Black Footed Cat          | 2002 | Africa 3<br>Mongoose |
| <u>FJ392383</u> | 420-90 | RSA | Yellow Mongoose           | 1990 | Africa 3<br>Mongoose |
| FJ392384        | 485-94 | RSA | <i>Suricata suricatta</i> | 1994 | Africa 3<br>Mongoose |

|                 |          |         |                           |      |                      |
|-----------------|----------|---------|---------------------------|------|----------------------|
| <u>FJ392385</u> | 669-90   | RSA     | Yellow Mongoose           | 1990 | Africa 3<br>Mongoose |
| FJ392386        | 718-98   | RSA     | <i>Genetta genetta</i>    | 1998 | Africa 3<br>Mongoose |
| FJ392387        | 759-96   | RSA     | Cat                       | 1996 | Africa 3<br>Mongoose |
| <u>FJ392388</u> | 767-95   | RSA     | Yellow Mongoose           | 1995 | Africa 3<br>Mongoose |
| <u>FJ392389</u> | 878-92   | RSA     | Mar Mongoose              | 1992 | Africa 3<br>Mongoose |
| FJ392390        | 926-93   | RSA     | <i>Suricata suricatta</i> | 1993 | Africa 3<br>Mongoose |
| <u>GU992322</u> | 93128MAR | Morocco | Dog                       | 1993 | Africa 2             |
| <u>HM179504</u> | 262-06   | RSA     | Dog                       | 2006 | Africa 1<br>Canid    |
| <u>HM179505</u> | 567-04   | RSA     | Dog                       | 2004 | Africa 1<br>Canid    |
| <u>HM179506</u> | 479-96   | RSA     | Dog                       | 1996 | Africa 1<br>Canid    |
| <u>HM179507</u> | 819-05   | RSA     | Black-backed Jackal       | 2005 | Africa 1<br>Canid    |
| <u>HM179508</u> | 31-05    | RSA     | Bat Eared Fox             | 2005 | Africa 1<br>Canid    |
| JQ692981        | 06-06    | RSA     | Sheep                     | 2006 | Africa 3<br>Mongoose |
| JQ692982        | 06-07    | RSA     | Cow                       | 2007 | Africa 3<br>Mongoose |
| <u>JQ692983</u> | 116-08   | RSA     | Yellow Mongoose           | 2008 | Africa 3             |

|                 |        |     |                               |      |                      |
|-----------------|--------|-----|-------------------------------|------|----------------------|
|                 |        |     |                               |      | Mongoose             |
| <u>JQ692984</u> | 131-08 | RSA | Slender Mongoose              | 2008 | Africa 3<br>Mongoose |
| JQ692985        | 18-06  | RSA | African Wildcat               | 2006 | Africa 3<br>Mongoose |
| <u>JQ692986</u> | 200-06 | RSA | <i>Garelella pulverulenta</i> | 2006 | Africa 3<br>Mongoose |
| JQ692987        | 27-08  | RSA | Bovine                        | 2008 | Africa 3<br>Mongoose |
| JQ692988        | 456-06 | RSA | African Wildcat               | 2006 | Africa 3<br>Mongoose |
| JQ692989        | 50-06  | RSA | Bovine                        | 2006 | Africa 3<br>Mongoose |
| <u>JQ692990</u> | 57-06  | RSA | Yellow Mongoose               | 2006 | Africa 3<br>Mongoose |
| <u>JQ692991</u> | 956-06 | RSA | Dog                           | 2006 | Africa 3<br>Mongoose |
| <u>JQ692992</u> | 265-06 | RSA | Yellow Mongoose               | 2006 | Africa 3<br>Mongoose |
| <u>JQ692993</u> | 418-06 | RSA | Yellow Mongoose               | 2006 | Africa 3<br>Mongoose |
| <u>JQ692994</u> | 696-06 | RSA | Yellow Mongoose               | 2006 | Africa 3<br>Mongoose |
| <u>JQ692995</u> | 257-05 | RSA | Yellow Mongoose               | 2005 | Africa 3<br>Mongoose |
| JQ692996        | 13-07  | RSA | African Wildcat               | 2007 | Africa 3<br>Mongoose |
| JX088728        | 28-06  | RSA | Bovine                        | 2006 | Africa 3<br>Mongoose |

|                                                       |                    |          |                  |      |                        |
|-------------------------------------------------------|--------------------|----------|------------------|------|------------------------|
| JX088729                                              | 235-07             | RSA      | Bovine           | 2007 | Africa 3<br>Mongoose   |
| JX088730                                              | 397-07             | RSA      | Bovine           | 2007 | Africa 3<br>Mongoose   |
| <u>JX088731</u>                                       | 416-07             | RSA      | Slender Mongoose | 2007 | Mongoose               |
| JX088732                                              | 584-06             | RSA      | African Wildcat  | 2006 | Africa 3<br>Mongoose   |
| <u>JX473838</u>                                       | 178J09             | Namibia  | Jackal           | 2009 | Africa 1<br>Canid      |
| <u>KY553268</u><br>KY553279 (G)<br>AY605016 (GL)      | 20607              | Zimbabwe | Mongoose         | 1992 | Africa 1<br>Canid      |
| KY553272                                              | RV589              | Zimbabwe | Honey Badger     | 1991 | Africa 1               |
| <u>KY563717</u><br>KY563715 G<br>AF177070 (GL)        | 22547              | Zimbabwe | Dog              | 1994 | Africa 1<br>Canid      |
| U22488                                                | 8670NGA            | Nigeria  | Human            | 1983 | Africa 1b              |
| U22485                                                | 8697BEN            | Benin    | Cat              | 1986 | Africa 2               |
| U22628                                                | 1500AFS            | RSA      | Yellow mongoose  | 1987 | Africa 3               |
| U22633                                                | 8721AFS            | RSA      | human            | 1981 | Africa 1b              |
| U22634                                                | 8801CAM            | Cameroon | Dog              | 1987 | Africa 2               |
| U22640                                                | 9012NIG            | Niger    | Dog              | 1990 | Africa 2               |
| This study<br>genome<br>DQ489796 (N)<br>DQ431318 (GL) | 806/99<br>(RV1435) | RSA      | Bat-eared Fox    | 1999 | Africa 1<br>Clade 2iii |
| This study                                            | 548/00             | RSA      | Bat-eared Fox    | 2000 | Africa 1               |

|                                                       |                    |         |                     |      |                        |
|-------------------------------------------------------|--------------------|---------|---------------------|------|------------------------|
| genome<br>DQ489807 (N)<br>DQ431368 (GL)               | (RV1448)           |         |                     |      | Clade 1                |
| This study<br>genome<br>DQ489810 (N)<br>DQ431353 (GL) | 681/00<br>(RV1451) | RSA     | Bat-eared Fox       | 2000 | Africa 1<br>Clade 2iv  |
| This study<br>genome<br>DQ489814 (N)<br>DQ431282 (GL) | 346/00<br>(RV1455) | RSA     | Bat-eared Fox       | 2000 | Africa 1<br>Clade 2ii  |
| This study<br>genome<br>DQ489826 (N)<br>DQ431308 (GL) | 312/03<br>(RV1476) | RSA     | Bat-eared Fox       | 2003 | Africa 1<br>Clade 2i   |
| This study<br>genome<br>DQ489828 (N)<br>DQ431340 (GL) | 476/03<br>(RV1480) | RSA     | Bat-eared Fox       | 2003 | Africa 1<br>Clade 2ii  |
| This study<br>genome<br>DQ194887 (N)<br>DQ431325 (GL) | NBA5<br>(RV1829)   | Namibia | Black-backed Jackal | 2000 | Africa 1<br>Clade 2iv  |
| This study<br>genome<br>DQ194861 (N)<br>DQ431316 (GL) | 773/95<br>(RV1869) | RSA     | Black-backed Jackal | 1995 | Africa 1<br>Clade 2iii |
