# Supplementary material for: Rabies in the African Civet: An Incidental Host for Lyssaviruses?
Source: MDPI journal article supplement (doi:10.3390/v12040368), 2020-03-27
Supplement: s1 [file s1]

Table S1: PCR primers used in the study

| Primer name | Primer location (PV) | Gene amplified | Primer sequence (5'-3') | Publication             |
|-------------|----------------------|----------------|-------------------------|-------------------------|
| JW12        | 55-73                | N              | ATGTAACACCYCTACAATGG    | Heaton et al., 1997     |
| 304R        | 1514-1533            | N              | TTGACGAAGATCTTGCTCAT    | McElhinney et al., 2011 |
| GT1 MFor2   | 3286-3305            | G              | CTATTAACATCCCTCAAAAG    | This study              |
| GT1 N-L Rev | 5966-5986            | G              | TCCCAGTCTAGGGCRTTCATG   |                         |
| VivMF       | 3081-3099            | G              | GATTCCTCTCTGCTTCTAG     | Van Zyl N. et al., 2010 |
| VivLR       | 5521-5543            | G              | CAAAGGAGAGTTGAGATTGTAGT |                         |
